# Supplementary material for: AtOPR3 specifically inhibits primary root growth in Arabidopsis under phosphate deficiency
Source: PubMed Central journal article supplement (PMC4840450; doi:10.1038/srep24778), 2016-04-22
Supplement: srep24778-s1.pdf [file srep24778-s1.pdf]

***AtOPR3* specifically inhibits primary root growth in Arabidopsis under  
phosphate deficiency**

Hongyan Zheng, Xiaoying Pan, Yuxia Deng, Huamao Wu, Pei Liu & Xuexian Li\*

## Figure S1

CTAAACAAACAATGTTTTCTAAAAATGGTATGCCCAAAAATGGTTTACGAAAAATAGACTCAAAAATACAAATGTCATTGGCGAA  
AAATAAATGACAATTAATGAATATACAAATAATAGATAAAAAAGCAAAATGAAATAAATTTCAATGTTTCATTTAGTTAAAGATAG  
TGTATCTTGAAGATCATAACGTATTTTAGATTATGTACCTGATTTATAAGTGGCTTATAAATCACCTACCATTTTACCAGTAACCGAT  
CTAATCTACACACAAAATATCATCTTTACTCTTATAAGATTTAACCATATTTTAGATCTCATAAGAATCAATGCAATTTTCATATAA  
AACATCAAAAATAATTTCTATAAATTAATTTTCTCAAGATAATATTTAATTTTATTATAAATCTCTTAATTAGCCATCTTTCTACATT  
TATCAAAAAGATATTAGCTATCTGTTCTCATAGGCAATATGATAAAAAAAAAAACTTTTTCCAAGTTAGGGGCACAAAAAGAGTTT  
CCCTGGGACTTGGGCTGAGAATAATGAAGTGGCTGGGAAATGATTAGTTAAGGATGGCTTGATGAATTCTCAATATTCTGTTGAG  
GGAACAAAATATACTAGGAAGGATGCAAGTCCAGTTTGGTCTAAACCATTGTACGAACCAAAAAACAATCAATAAAGTAACTCAG  
GGCTCACAAATGGTCGATAATATTTCTAAAGTTTCAGTTCTAGAGGATGAGCAAAAAGGATTTGATGATGGGAGATGTACTAGAGG  
TACAAGACAAGAGTCTCACTGAAGGGTTGAATTTAGATATTTTAAATCACGTTTGGAGTAACAAAAACAATGTGAGAAGGA  
GCTCAATTAGCTCCAAGTGAATCTAGTGTATTAGGGATACTTTGGAACTCCAATTCAATCTTAAAGATGTAGGATTGATGAATT  
CATGGAAATCGGCAGATCCATCTATGAATTTAGTATGGTGGTGTTCCTAGGAATTGACAATAACAATTTACTTGGTGC AAAAGTGT  
CTTCGGAGGTGCCCTTTCTTTTCACTCGGAATTGGAAGTTTAAATATTGGCAATAAA AATATCCTTTCAAGAAGGATAAAGTG  
TCAGGCATTTGAAACAGATAATTATTCAGAGTAAGTTTTGATGGTACAGTCCCTGAAGAATGACTCGCTTTCTCTAATTTTTTAG  
AAGATCTTGAATTGCTATGTGTCTCCTTTCTTGCTTTCTTCTATTTTCATGTTTATGTAATACTAAGGCAAACTATTTAGCACAAAT  
TCTAAACTTTTATTTCTGAAGTTATTTTTAAACCCTTTCCCTCCTAATTGGACAACCAATCATGGAATTAGTTTTTACGTAATGT  
TTTAAACTCACTATTTACCTTTATTCTGACCTGTTAATGGAAGACAACATGACTTTATAACATTGAAATGTTGTCAACCTGTTATA  
TATTAATGTTAACATAGCTAATGACCTATCAATGTACGTAAAGCGAATGTCAATCATATTCGTATCCGTTAATTTTCATTTAGGAAATC  
AGGCTCATTGCCAATCCACTAAGAAACATCTCTGATAGATCCAAATAATAAAAAATAATATAATATGAAGCAAAATAGAACGAAATA  
TCTCACGCGGACCAAACTTTGAACTTTATTATAAAACAAATCAGCACGTGAAAGTAATGGTCGGTCCGTTCCGTTCCAAAGATGCCAAGA  
ACTCCTCCGGTCCATCCATCAACCTAACCTTTTTGGATATAAAATTTAGCAAATTCATTTCCACGACCACACAACAACAACACA  
TCCACTCGAATTTCTATTTCCGAATAACAAAACCGGTAAACTCATCACAACTTAAGTTACTTTGTAGTTTGTGTTTTGTCTTT  
TATGTAATGAAGAAGATCCAACCTAACTACTACTCAATATTTTGTATTGACCGTTGATTTCTCAGATCTGACTTTTACTTCTCCTTC  
TTCCAGATCGGCGGAGACATG

### Figure S1. The 5'-upstream region of *AtOPR3*.

The putative P1BS element, P1BS-like element, and the start codon were highlighted in red, green, and yellow, respectively.

**Figure S2**

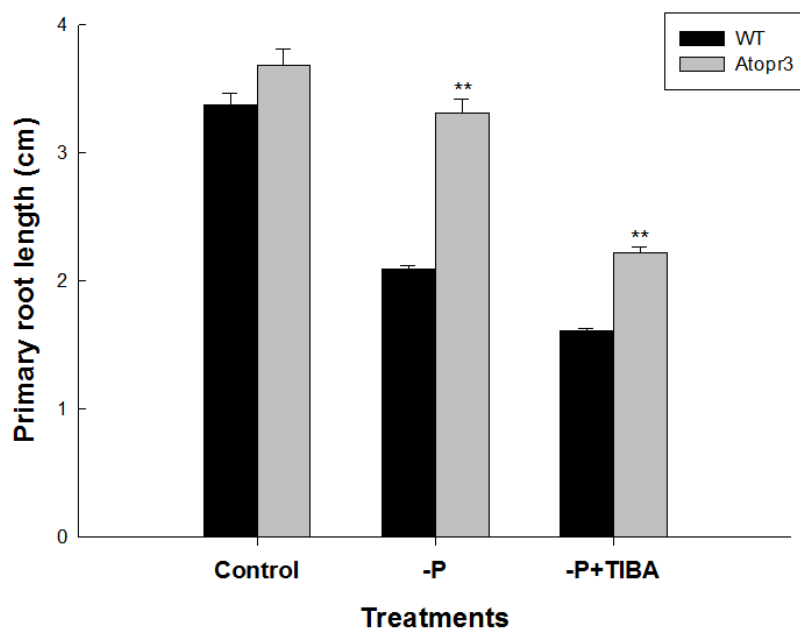

**Figure S2. Auxin polar transport and primary root growth in *Atopr3* and WT plants under P deficiency.**

Seedlings were grown as described in Fig. 2. TIBA (5 $\mu$ M) was applied to inhibit auxin polar transport. Results were presented as means (n=30) with error bars (standard deviation). Asterisks indicated significant differences as determined by a t-test analysis (\*\*, P<0.01).

**Table S1. The relative length of the primary root in wild type *Arabidopsis* (*Ws*) and *opr3* mutant plants (*Atopr3*) without or with various concentrations of chemicals under P deficiency. The root length without the chemical treatment was set as 100%.**

| Concentration<br>( $\mu\text{M}$ ) | GA     |               | PAC   |               | Ancymidol |               | TIBA  |               |
|------------------------------------|--------|---------------|-------|---------------|-----------|---------------|-------|---------------|
|                                    | WT     | <i>Atopr3</i> | WT    | <i>Atopr3</i> | WT        | <i>Atopr3</i> | WT    | <i>Atopr3</i> |
| <b>0</b>                           | 100%   | 100%          | 100%  | 100%          | 100%      | 100%          | 100%  | 100%          |
| <b>0.5</b>                         | -      | -             | -     | -             | -         | -             | -     | -             |
| <b>1</b>                           | -      | -             | -     | -             | -         | -             | 92.5% | 97.2%         |
| <b>1.5</b>                         | -      | -             | -     | -             | -         | -             | -     | -             |
| <b>2</b>                           | -      | -             | -     | -             | -         | -             | -     | -             |
| <b>2.5</b>                         | 114.3% | 108.0%        | 70.9% | 62.3%         | 78.9%     | 76.0%         | -     | -             |
| <b>3</b>                           | -      | -             | -     | -             | -         | -             | 83.1% | 83.8%         |
| <b>5</b>                           | 116.2% | 110.3%        | 77.0% | 64.1%         | 74.2%     | 59.5%         | 77.0% | 67.0%         |
| <b>7.5</b>                         | 135.7% | 104.2%        | 76.5% | 62.0%         | 66.7%     | 54.2%         | -     | -             |
| <b>10</b>                          | 100.7% | 94.4%         | -     | -             | -         | -             | -     | -             |

**Table S2. Primers used to analyze gene expression levels via RT-qPCR in our studies.**

| Gene           | Primer sequence                 |
|----------------|---------------------------------|
| <i>AtOPR3</i>  | 5'—3' AAGGTGTAGTTTCAGCCATAGGA   |
|                | 5'—3' GATAGTGGGTCAGAATCAGTTGC   |
| <i>AtACS2</i>  | 5'—3' AGATCGTCGAGAAAGCATCTG     |
|                | 5'—3' GAAGAGGTGAGTGTGGTGAC      |
| <i>AtCTR1</i>  | 5'—3' GCCACCCAGTGCTAATATGCC     |
|                | 5'—3' CAAAGGAACCTGCTCCAATCT     |
| <i>At20OX1</i> | 5'—3' GATCCATCCTCCACTTTAGA      |
|                | 5'—3' GTGTATTCATGAGCGTCTGA      |
| <i>At20OX2</i> | 5'—3' ACCGAGACTATTTCCGAGGATT    |
|                | 5'—3' TGTTTGGCATGGAGGATAATG     |
| <i>At20OX3</i> | 5'—3' CCTATCTGCATATGGACTC       |
|                | 5'—3' AACCTTCCCGAAATCTTC        |
| <i>At3OX1</i>  | 5'—3' TCCGAAGGTTTCACCATCACT     |
|                | 5'—3' TCGCAGTAGTTGAGGTGATGTTG   |
| <i>At3OX2</i>  | 5'—3' CCTCGCGACTTCTCGAC         |
|                | 5'—3' AATAATTTACAGTATTTGAGG     |
| <i>At2OX1</i>  | 5'—3' CGGGAACTTTCAGAAACGC       |
|                | 5'—3' ACATTCTTACCACCATTGG       |
| <i>At2OX2</i>  | 5'—3' CCTAAAACCTCCGCCGTTTT      |
|                | 5'—3' CCTTCATGTACTCCTCCACCGA    |
| <i>AtLPR1</i>  | 5'—3' AGAAACTCCAAAATCAGGGACTACA |
|                | 5'—3' ATGGTCCAATATGTGACAATGGTAG |
| <i>ATLPR2</i>  | 5'—3' GAGGCATAAAGCAAGAGGAGC     |
|                | 5'—3' GCAGGCAAGTCTCTGTGGAA      |
| <i>ATPRD</i>   | 5'—3' CAAATGCGCTTCGTATCTCC      |
|                | 5'—3' TAAAACAGCGTCTGCGTCTG      |
| <i>ATPDR2</i>  | 5'—3' CTTTTCACTACGTGGTCCGTGG    |
|                | 5'—3' TGTCTCCCGAGGATGCTGAAT     |
| <i>ATPLD1</i>  | 5'—3' TGGATGGCAACCGCAAAGACAA    |
|                | 5'—3' ATCGTTGTGTGTCCAGCTTCT     |
| <i>ATPLD2</i>  | 5'—3' TTTGAGGACGGTCCAATTGCCA    |
|                | 5'—3' ACAACACCGATCTCAGAGTCTCGT  |
| <i>AtTUB4</i>  | 5'—3' AGAGGTTGACGAGCAGATGA      |
|                | 5'—3' CCTCTTCTTCTCCTCGTAC       |
